# Supplementary material for: Xyloglucan is released by plants and promotes soil particle aggregation
Source: PubMed Central journal article supplement (PMC5813166; doi:10.1111/nph.14897), 2017-11-15
Supplement: NPH-217-1128-s001.pdf [file NPH-217-1128-s001.pdf]

## New Phytologist Supporting Information

Article title: **Xyloglucan is released by plants and promotes soil particle aggregation**

Authors: Andrew F. Galloway, Martin J. Pedersen, Beverley Merry, Susan E. Marcus, Joshua Blacker, Liane G. Benning, Katie J. Field and J. Paul Knox

Article acceptance date: 18 October 2017

The following Supporting Information is available for this article:

**Table. S1 Heat maps of cell wall polysaccharide epitope detection in hydroponates from six crop species.** Plants were grown for two or three weeks and hydroponates immunoassayed directly by ELISA. Absorbance values shown are those for 1:25 dilution for the grasses and 1:5 dilution for pea, tomato and rapeseed analyses. Data are a mean of three biological replicates. Values shown are absorbance units at 450 nm.

| Antigen                                           | MAb    | Grasses |        |       | Eudicotyledons |        |          |
|---------------------------------------------------|--------|---------|--------|-------|----------------|--------|----------|
|                                                   |        | Wheat   | Barley | Maize | Pea            | Tomato | Rapeseed |
| Pectic polysaccharides<br><i>Homogalacturonan</i> | LM19   | 0.10    | 0.11   | 0.12  | 0.18           | 0.3    | 0.2      |
|                                                   | JIM7   | 0.06    | 0.1    | 0.08  | 0.15           | 0.91   | 0.12     |
|                                                   | LM20   | 0.06    | 0.07   | 0.08  | 0.15           | 0.21   | 0.09     |
| <i>Rhamnogalacturonan-I</i>                       | LM5    | 0.07    | 0.12   | 0.11  | 0.2            | 0.27   | 0.13     |
|                                                   | LM6    | 0.06    | 1.58   | 0.08  | 0.17           | 0.72   | 0.09     |
| Arabinogalactan-protein                           | LM2    | 0.78    | 0.71   | 0.33  | 0.33           | 2.83   | 0.13     |
|                                                   | MAC207 | 0.05    | 0.09   | 0.09  | 0.16           | 1.08   | 0.73     |
| Extensin                                          | LM1    | 1.45    | 1.19   | 0.21  | 0.6            | 0.49   | 0.09     |
| Xylan                                             | LM11   | 1.13    | 0.69   | 0.39  | 0.21           | 0.29   | 0.6      |
| Xyloglucan                                        | LM25   | 2.32    | 1.14   | 1.25  | 0.29           | 0.25   | 0.57     |

**Table. S2 Heat maps of cell wall polysaccharide epitope detection in medium from liquid cultures of Arabidopsis and bryophytes.** Shaking liquid cultures of *Arabidopsis* (*At*) and three bryophytes: *Physcomitrella patens* (*Pp*), *Marchantia polymorpha* (*Mp*), and *Blasia pusilla* (*Bp*). *At* assay of 1:5 dilution of media and bryophytes 1:25 dilution of media. Values shown are absorbance units at 450 nm.

| MAb    | <i>At</i> | Bryophytes |           |           |
|--------|-----------|------------|-----------|-----------|
|        |           | <i>Pp</i>  | <i>Mp</i> | <i>Bp</i> |
| LM19   | 0.52      | 0.07       | 0.08      | 0.12      |
| JIM7   | 0.17      | 0.06       | 0.06      | 0.07      |
| LM20   | 0.10      | 0.05       | 0.06      | 0.07      |
| LM5    | 0.09      | 0.07       | 0.06      | 0.09      |
| LM6    | 0.20      | 0.06       | 0.05      | 0.07      |
| LM2    | 0.26      | 0.10       | 0.34      | 0.63      |
| MAC207 | 0.15      | 0.15       | 0.15      | 0.33      |
| LM1    | 0.89      | 0.05       | 0.06      | 0.37      |
| LM11   | 0.15      | 0.06       | 0.07      | 0.08      |
| LM25   | 0.65      | 0.42       | 0.41      | 1.84      |
